# Supplementary material for: Fruitless mutant male mosquitoes gain attraction to human odor
Source: eLife. 2020 Dec 7;9:e63982. doi: 10.7554/eLife.63982 (PMC7806257; doi:10.7554/eLife.63982)
Supplement: Figure 1—source data 1. [file elife-63982-fig1-data1.xlsx]

## Sheet: Figure 1C
Figure 1C- Percentage of wild-type mosquitoes in cage next to live human arm
	+/+ female (% next to arm)							+/+ male (% next to arm)
time	trial 1	trial 2	trial 3	trial 4	trial 5	trial 6		trial 1	trial 2	trial 3	trial 4	trial 5	trial 6
0:00	5	0	5	0	0	5		0	10.5263	5	5	0	0
0:30	10	10	10	10	26.3158	45		0	10.5263	5	5	4.7619	0
1:00	25	30	25	20	42.1053	50		0	10.5263	5	5	4.7619	0
1:30	30	60	40	30	47.3684	50		0	10.5263	5	5	9.52381	0
2:00	40	75	40	30	57.8947	65		0	10.5263	10	5	9.52381	0
2:30	45	60	50	45	57.8947	50		5	10.5263	10	5	4.7619	0
3:00	45	75	60	45	47.3684	60		5	10.5263	10	5	4.7619	0
3:30	50	75	75	50	47.3684	70		5	10.5263	10	5	4.7619	0
4:00	50	90	85	40	36.8421	65		5	10.5263	10	5	4.7619	0
4:30	40	85	75	45	47.3684	60		5	10.5263	10	5	4.7619	0
5:00	40	85	85	30	52.6316	65		5	5.26316	10	5	4.7619	0
5:30	45	90	90	45	36.8421	75		10	5.26316	10	5	4.7619	5.88235
6:00	45	90	85	40	31.5789	65		5	5.26316	15	5	0	5.88235
6:30	50	90	80	35	31.5789	80		5	10.5263	15	5	4.7619	0
7:00	50	90	80	40	21.0526	70		5	10.5263	15	5	4.7619	0
7:30	50	85	90	25	42.1053	65		5	10.5263	15	5	4.7619	0
8:00	45	80	85	25	42.1053	60		5	10.5263	15	5	4.7619	0
8:30	55	85	90	20	42.1053	60		5	10.5263	15	5	4.7619	0
9:00	55	90	90	50	26.3158	60		5	10.5263	15	5	4.7619	0
9:30	50	90	85	50	52.6316	55		5	10.5263	15	5	4.7619	0
10:00	55	80	85	45	47.3684	50		5	10.5263	15	5	4.7619	0

## Sheet: Figure 1F
Figure 1F: Sequences of fruitless exons
Species	m exon sequence	f exon sequence	c1 exon sequence
Aedes aegypti	CTCCTTCAAGTTACTGTTGCAAGTTCTCAATAGTATGTCATCGCCGCCTGCAATGCCCAATTACAATAACCGTTACCCGGCATTGAACGGCTATCCCCAGATCAACGGTGTCGACCCGGCAGAACCCATCGATTGTCGTAAGCTTCAATCGCACCGAAG	GTATGTTGAGCGGGGTTTCCATAGACACAAAATTAAGGCGAGAAATCGCCAACCGTATAACCATTGCTGATCTTACCAGCACACATCATCATGGAATCTTCTGACCGATCGCGTCATCGATCGTGTCTTGTACATTTACCATGCGAGCTTGAATCAAGGGAAACACACATATGTACTATAAAAAAATAAAGAAATGATAAATCTTGCAATGAATATACCTTATCTAATAAATATAACAATCAAAAAAACGCCAGCCGTCTATCAAAGATGAGAAATCAAATACACCTGCAAACATTTGATATCCTGTAAAAAAAACGAAAAGCAGTACTAATAGACAAATACGATAATAATATACGATAATAACGTCAAACGTAGCAGCAATTCAGGTTAACCATTTTA…	GAACAGCACTGACACAGGAACAATGGACCAGCAGTATTGCTTACGCTGGAACAACCATCAGTCCAACCTGACGACCGTGCTCAGAACCCTGCTGGAAGATGAGAAACTGTGTGATGTCACGCTCGCCTGCGATAATGGAATTGTCAAA
Wyeomyia smithii	CACTCGTAAACTTTTTCAACAAGTGCTCCGCAACATGTCTTCGTCACCAGCGATACCAATTTACTCGGGTCGATATCCGGCACCTAATGGTTATCCGCCTATGAACGGAGAACCGGCAGAGCCGCTCGATTTCCGTAAGGTTGAATCGCTCCGCAG	GTATGTTTGGGCTTTCCATAGGAAAAAAATGGCCACCGATGGTCCAGCTGCGCAATGCGTTAATTCTTTAACGGAATAAACCGTCAACGATCACGCTATTTACATGCAACATCACGCAAAATCTTGTACATTTACAATGCGAGCTTGAATCAAGGGAAACATACATATGTAATCAAACCAAAACAGTCAAAACTATGATAGTCACAATAATTTAACATATTAATTAACAATCAAACGCAAACGGAAGTAGGCTAGCCTGTAATCAAAGTGAATAAAGTCAAAATTTGCAAACCATCAACAGTATGCTGTACATTTTGAGATAAAGCAAACAACTAATAAGCAAGTATGATAATAAATACCGATAATAACTTCCGCAACAGAGGCAATTCAGGTTAAATA…	GAACAGCACTGACACAGGAACAATGGACCAGCAGTACTGTTTACGCTGGAACAACCATCAGTCCAATCTGACTACCGTGTTAACAACCCTGCTGCAAGATGAGAAACTGTGTGACGTTACGCTCGCCTGCGACAAGGGAATCGTCAAA
Toxorhynchites amboinensis	CACTGTGAAAATCCTTCTCCAAGTGCTGCACAAAATGTCCTCGCCGGCAGCAATACCGCTATACTCCAGTCGCTATCCGACACCGAACGGCTATCCCCCAATCAATGGGGAATCGGCCGAACCGCTCGATTTTCGTAAGGTCGAATCGCTTCGCAG	GTATGTGTGGGCTTTCCATAGGATCAGATCTCCGAGCAGTACTTCGAGCTATCGGAAGTAATCAACCGGAATCGGAATCAAAATAACAATTTAACCATAATCTTGTACATTCACCATGCGAGCTTGAATCAAGGGAAACACACATATGTACTAAAGGTAACCTAAACCGTTATTACTTCGAAGCTACTAATATCAACTACAATCAAAGTTAATACATCGCCAAACGAACGTGCGTTATACTAGAAATCATAACAAATCAAAACTAATACCCTGTAAAAATCGAAAAGCAGTAATAATAAGCAAATATGATAATAATTATGATAATAATGCGGTCGAATAGCTGCAAATACAAGGTTAACTATTATATCAAAAGTGTTTCTATAAGTAGACTAGAAAGTG…	GAACAGCACTGACACTGGAACAATGGACCAGCAATATTGTCTACGCTGGAATAACCACCAATCCAATTTGACAACCGTGCTCACCACCCTGCTGCAAGATGAAAAACTGTGTGATGTCACGCTCGCCTGCGATAAAGGAATCGTCAAA
Culex quinquefasciatus	CTCGTTGAAATTCCTGCTGCAAGTGCTCGACACCATGTCATCGCCGCCGACGATACCGCTGTACAGTGGCCGGTACCCGAACGGGTACGGGCCGCCCTTTAACGGCATCGAGCCGCACGAACCGCTCGACTTCCGCAAGGTCGAATCCCAGCGCAG	GTATGTTTGGGCTTTCCACCGCGCCAAAAACGTCAAACAACCCCCCCGTGGTGTAAAACCATGAGAAGTGAAGTTGAGCCAAGTTAGAATCTCCTAAGAATCTTGTACATTTACCATGCGAGCTTGAATCAAGGGAAACACACACATACATATGTAACTAAGAAAACAAATCAAATCAAAACAAAGCTAAATTTTACATATAAACACGTGCGAAACATATTTGTAATAACAATCAAAGAAAAAAAAACCGTCAAACGGAAGTGAGCTAGATTATAACTAAAGAGTAGCGCAAATAACCCACAGTACTAAGTACCCTGTAAAGTTTGACAAGCAGTACTAATAAGCAAATACGATAATAATGAATGATAATAACGTGACAGTAATAAAAACAGTAGCAAT…	GAACAGCACTGACACAGGAACAATGGACCAGCAGTACTGTCTCCGCTGGAACAACCATCAGTCCAACCTGACGACAGTGCTGACGACGCTGCTGCAAGATGAGAAGCTGTGCGATGTCACGCTGGCCTGTGACAAGGGCATTGTCAAG
Anopheles gambiae	CTCCAACCGCACCACCGCAGCAGCAGCATCGGCAGCATCGGACTTGTTCAACATGGCTTCCTCACCGGCACTTCCACTGTACGCGAGCCGCTATCCGACGCCGAACGGATACCCGCAGATCAACGGGGAGGTCGACGCGCCGCTCGACTTTCGCAAGGTGGAATCGCTACGCAG	GTACGTCCCGCAGCCCAGTGGGAAGAGATGCGCTGATGGCTCTTCGCGTGCCGGAGAGCCTTGTCGAGCCTTCCACATCAATCAACCTATTACACAGTGTTTATCAGTCTAGCGGGGGGAGAACATAGGGAAAAGCACAGCTTTGTTACATGTGTGTGAGTGTGTATGTGAATGTGCGTTGCGTCTTTGGCGCAATCGCTGACATCGCTGGGCAATGGGAACACGTCCGAAGAACACATCCAATTTCAAAAGCAATAGGGCCTCATCATATCGATCCAGGAGCAGGTGCATTAGTAGCGATAGGCTTGACGCACCAAGGAGAGTCGGAAAATTGGCCCGCTTTTCCTCCGCGTCCTGTGGCTGCTGAGGACGCCAGGAGCGTTCTGCGTGCCTGTACAT…	GAACAGCACCGACACCGGCATCATGGACCAGCAATACTGTCTGCGCTGGAACAATCATCAGTCTAACTTAACCACCGTGCTCACCACGCTCCTACAAGATGAGAAACTGTGCGACGTCACGCTCGCCTGCGAGAAGGGCATGGTCAAA
Drosophila melanogaster	CCAGAGCCAAAATGATGGCGACGTCACAGGATTATTTTGGCAATCCATACGCCCTTTTCCGTGGACCGCCCACAACTCTGCGGCCGCGCGAGTCGCCGCTGGGCGTGGGCCACCCTCACGGTCATGGGCACCTGCACAGCCACGCCCATGCCCACGGGCACGGCCACGCCCACTCGCATTACGCGGCCTTGGACTTGCAGACGCCGCACAAGCGGAACATCGAAACGGATGTGCGGGCACCGCCGCCGCCATTGCCGCCGCCACCGCTTCCGCTTCCGCCCGCATCCCCTAG	GTAAGCCTCCCCACCCCCCCCCCCCCCCCCGAAAAAGAGTAAAACCAAAATGGGGGAGGAAGAGAGAAAGTGGGCAGTTTAACACCAGATCGAAGACGAGCAAAGAATTGCGGAGAAATCAAAAAACCAAAAGCCAATTCACATTGGCATATCATCAGCAACACACATCAACACACTTCTCTGCTATGTCTGCAATCAACCAAAATATCGAAAAAAGAAAAACAAAAAGAGTCAACATCAATTTTAAAGTTTTTACGTTGGTTCAAAAGAGTTTAAAATGCCCTTAACTATTAACGCCCAAAAGTAAACGTAGATTAAAGTAATATTAGCCAATCAATCGTAAAATATCAGCTTTCATTTTTTAAACCTTACCAATGGACTTTGATCCCATCAATTGCA…	GTACAACACTGACCAAGGAGCGATGGACCAGCAATTCTGCTTGCGCTGGAACAATCATCCCACAAATTTGACCGGCGTGCTAACCTCACTGCTGCAGCGGGAGGCGCTATGCGACGTCACGCTCGCCTGCGAGGGCGAAACAGTCAAG

## Sheet: Figure 1G
Figure 1G- Normalized mean exon counts for each exon in fruitless from brain RNAseq data
Figure 1G- exon usage in brain
			female brain					male brain
exon number	exon name		replicate 1	replicate 2	replicate 3	replicate 4		replicate 1	replicate 2	replicate 3
1			153.846	92.3242	44.1989	41.6667		12.5471	5.32481	5.1458
2			483.728	377.348	207.433	172.917		48.9335	37.2737	30.8748
3			318.047	238.325	159.216	127.083		38.8959	27.689	21.4408
4			14.7929	8.05153	18.0814	0		7.52823	5.32481	8.57633
5			14.7929	8.05153	18.0814	0		7.52823	5.32481	8.57633
6			14.7929	8.05153	18.0814	0		7.52823	5.32481	8.57633
7			14.7929	8.05153	18.0814	0		7.52823	5.32481	8.57633
8			14.7929	9.12507	18.0814	0		7.52823	5.32481	8.57633
9			13.3136	9.12507	18.0814	0		7.52823	5.32481	8.57633
10			14.7929	9.12507	18.5836	0		7.52823	5.32481	8.57633
11			680.473	413.312	394.274	254.167		131.744	99.0415	66.8954
12			1260.36	1162.1	1052.24	875		317.44	253.461	241.852
13			658.284	926.463	856.856	750		237.139	214.058	208.405
14			1815.09	2304.35	1868.41	1702.08		678.795	507.987	463.979
15			93.1953	152.979	134.103	137.5		43.9147	47.9233	26.5866
16			507.396	1032.21	837.268	814.583		343.789	265.176	249.571
17			334.32	697.799	535.409	570.833		204.517	155.485	160.377
18			60.6509	115.405	88.3978	77.0833		37.6412	27.689	25.729
19	m		1025.15	1354.8	1136.11	1327.08		459.222	339.723	294.168
20	f		5044.38	5716.59	5063.79	4564.58		12.5471	1.06496	3.43053
21			165.68	137.413	174.787	93.75		51.4429	51.1182	71.1835
22			0	0	0	0		0	0	0.857633
23			0	9.66184	2.5113	0		1.25471	0	6.00343
24			0	0	0	0		0	0	0
25			5.91716	7.51476	8.53842	39.5833		3.76412	2.12993	2.5729
26			0	0	2.5113	0		1.25471	0	2.5729
27			13.3136	16.1031	5.0226	20.8333		10.0376	2.12993	13.7221
28			23.6686	20.934	20.0904	37.5		15.0565	5.32481	14.5798
29	c1		710.059	1257.65	1013.56	1270.83		503.137	404.686	382.504
30			976.331	1351.58	1081.87	1577.08		393.977	328.009	354.202
31			1720.41	2037.04	1532.9	2520.83		521.957	433.44	570.326
32			815.089	1368.22	1121.55	1672.92		350.063	312.034	351.63
33			727.811	552.335	633.852	752.083		255.96	248.136	335.334
34			177.515	270.531	314.917	381.25		67.7541	60.7029	58.319
35			446.746	560.923	571.07	725		186.951	168.264	174.099
36			729.29	1146.54	948.769	1527.08		326.223	279.02	325.043
37			2852.07	3868.49	3103.97	3060.42		1272.27	1045.79	921.955
38			22122.8	19938.3	17193.4	15222.9		12323.7	10620.9	10687
39			127.219	146.001	102.963	177.083		84.0652	40.4686	47.1698

## Sheet: Figure 1H
Figure 1H - Normalized exon counts of fruitless m, f, c1 exons from bulk RNA-seq data collected from the indicated tissues
N/A indicates the absence of a 4th replicate for the indicated tissue
Males lack ovaries and so this tissue was only sampled in females
	female m exon					male m exon					female f exon					male f exon					female c1 exon					male c1 exon
Tissue	replicate 1	replicate 2	replicate 3	replicate 4		replicate 1	replicate 2	replicate 3	replicate 4		replicate 1	replicate 2	replicate 3	replicate 4		replicate 1	replicate 2	replicate 3	replicate 4		replicate 1	replicate 2	replicate 3	replicate 4		replicate 1	replicate 2	replicate 3	replicate 4
Brain	1025.15	1354.8	1136.11	1327.08		459.222	339.723	294.168	N/A		5044.38	5716.59	5063.79	4564.58		12.5471	1.06496	3.43053	N/A		710.059	1257.65	1013.56	1270.83		503.137	404.686	382.504	N/A
Antenna	773.639	870.588	1214.04	N/A		1234.96	912.527	868.372	N/A		1671.92	1566.39	1871.93	N/A		30.7298	18.3585	22.4579	N/A		233.524	189.916	245.614	N/A		151.729	170.626	321.896	N/A
Rostrum	8.27206	8.84956	15.3121	N/A		35.0877	78.1969	22.6293	N/A		83.6397	86.7257	94.2285	N/A		1.03199	1.83993	0.538793	N/A		149.816	200	164.9	N/A		244.582	290.708	278.017	N/A
Foreleg	5.66038	8.48176	6.06061	N/A		8.31025	6.36943	9.81461	N/A		60.3774	80.5768	51.5152	N/A		0	0	4.36205	N/A		552.83	516.539	675.758	N/A		342.105	375.796	368.593	N/A
Midleg	3.85356	5.70125	5.5336	N/A		3.31126	1.36147	3.88727	N/A		44.316	35.3478	43.4783	N/A		0	0	0.971817	N/A		470.135	582.668	524.111	N/A		281.457	354.663	371.234	N/A
Hindleg	7.28787	7.88436	13.7825	17.8571		2.331	3.89105	1.71527	3.9823		49.4534	65.703	78.1011	54.9451		1.1655	1.29702	0	2.21239		479.958	504.599	462.481	524.725		381.119	387.808	459.691	350
Abdominal tip	4.9505	2.00602	5.7971	N/A		3.38409	7.12251	0.946074	N/A		31.3531	17.0512	34.7826	N/A		0	2.13675	1.89215	N/A		231.023	231.695	275.362	N/A		195.149	187.322	169.347	N/A
Ovary	0	2.54453	0	N/A							3.97351	5.08906	6.14754	N/A							3176.82	4013.36	3086.07	N/A
