# Supplementary material for: Fruitless mutant male mosquitoes gain attraction to human odor
Source: eLife. 2020 Dec 7;9:e63982. doi: 10.7554/eLife.63982 (PMC7806257; doi:10.7554/eLife.63982)
Supplement: Figure 3—source data 1. [file elife-63982-fig3-data1.xlsx]

## Sheet: Figure 3F
Figure 3F- Number of fruitless+ antennal lobe glomeruli
Genotype	fruitless∆M-tdTomato/+	fruitless∆M-tdTomato/+	fruitless∆M/fruitless∆M-tdTomato
Sex	female	male	male
# fruitless+ glomeruli	13	6	5
	12	4	6
	10	6	6
		6	5
