# Supplementary material for: Fruitless mutant male mosquitoes gain attraction to human odor
Source: eLife. 2020 Dec 7;9:e63982. doi: 10.7554/eLife.63982 (PMC7806257; doi:10.7554/eLife.63982)
Supplement: Figure 4—source data 1. [file elife-63982-fig4-data1.xlsx]

## Sheet: Figure 4B
Figure 4B- Percentage of mosquitoes feeding on the indicated meal through net
	+/+ female (% feeding)									+/+ male (% feeding)									fruitless∆M/fruitless∆M-tdTomato male (% feeding)
Meal	trial 1	trial 2	trial 3	trial 4	trial 5	trial 6	trial 7	trial 8		trial 1	trial 2	trial 3	trial 4	trial 5	trial 6	trial 7	trial 8		trial 1	trial 2	trial 3	trial 4	trial 5	trial 6	trial 7	trial 8
Water	0	0	0	0	0	0	0	0		5	10	0	5	10	10	5	10		0	0	0	0	0	0	0	0
Sucrose	75	70	65	70	85	75	80	85		35	90	70	55	40	60	45	35		80	75	70	70	65	85	75	60
Blood	40	55	45	70	45	45	50	55		10	5	10	5	5	5	10	0		0	0	0	0	0	0	5	0

## Sheet: Figure 4D
Figure 4D- Percentage of inseminated wild-type female mosquitoes
Genotype of male
none	+/+	fruitless∆M/fruitless∆M-tdTomato
0	90	0
0	100	0
0	90	0
0	90	0
0	100	0
0	100	0

## Sheet: Figure 4G
Figure 4G- percentage of mosquitoes participating in Quattroport assay
Genotype	+/+	+/+	+/+	+/+	+/+	+/+	+/+	+/+
Sex	female	male	female	male	female	male	female	male
Stimulus	blank	blank	CO2	CO2	arm	arm	honey	honey
% Activated	30	36.8	75	47.6	95	68.2	81.8	63.6
	38.1	52.4	78.9	63.2	100	61.1	85	80
	40	42.9	84.2	40	78.9	66.7	81	90.5
	33.3	33.3	78.9	57.1	90.5	78.9	86.4	94.7
	50	25	77.3	76.2	100	76.2	61.5	80
	40	30	73.7	50	94.1	47.1	87.5	77.8
	78.9	33.3	86.4	47.8	94.7	45	57.1	85.7
	75	52.6	86.4	38.1	95.5	52.4	84.2	73.3
			94.7	50	90.5	68.4
			100		100	60
			90.5		85.7	52.6
			90.5		95	55
			95		75	73.9
			85		95.2

## Sheet: Figure 4I
Figure 4I- percentage of mosquitoes entering trap in Quattroport assay
Genotype	+/+	+/+	+/+	+/+	fruitless∆M/fruitless∆M-tdTomato	fruitless∆M/fruitless∆M-tdTomato
Sex	female	female	male	male	male	male
Stimulus	glycerol	honey	glycerol	honey	glycerol	honey
% Attracted	0	13.6	0	36.4	0	47.8
	0	35	0	45	0	58.8
	0	52.4	0	42.9	0	55
	0	54.5	0	36.8	0	43.8
	0	23.1	0	25	0	36
	0	12.5	0	22.2	0	39.3
	0	23.8	0	19	0	43.5
	0	36.8	0	20	0	12.5

## Sheet: Figure 4K
Figure 4K- percentage of mosquitoes entering trap in Quattroport assay
Genotype	+/+	+/+	+/+	+/+	fruitless∆M/fruitless∆M-tdTomato	fruitless∆M/fruitless∆M-tdTomato
Sex	female	female	male	male	male	male
Stimulus	blank	human arm	blank	human arm	blank	human arm
% Attracted	0	85	0	0	0	47.4
	0	95.2	0	0	0	66.7
	0	73.7	0	0	0	55
	5.3	85.7	0	0	0	78.9
	0	85	0	0	0	45
	0	94.1	0	0	0	78.9
	0	89.5	0	0	0	66.7
	4.5	81.8	0	0	0	73.7
	0	76.2	0	0	0	62.5
	5.6	73.7		0		47.4
	4.8	76.2		0		47.8
	0	95		0		61.9
	5	75		0		78.3
	0	85.7
