# Supplementary material for: Fruitless mutant male mosquitoes gain attraction to human odor
Source: eLife. 2020 Dec 7;9:e63982. doi: 10.7554/eLife.63982 (PMC7806257; doi:10.7554/eLife.63982)
Supplement: Figure 5—figure supplement 1—source data 1. [file elife-63982-fig5-figsupp1-data1.xlsx]

## Sheet: Figure 5-figure supplement 1A
Figure 5 - figure supplement 1A- percentage of females crossed to indicated male genotype blood-feeding on live human arm
Female genotype	+/+	+/+	+/+	+/+	+/+	fruitless∆M/+	fruitless∆M-tdTomato/+	fruitless∆M/fruitless∆M-tdTomato
Male genotype	none	+/+	fruitless∆M/+	fruitless∆M-tdTomato/+	fruitless∆M/fruitless∆M-tdTomato	+/+	+/+	+/+
% Feeding	76.9231	90	100	100	84.6154	100	100	60
	12.5	95.2381	100	94.7368	88.4615	100	95.4545	72.7273
	58.8235	86.3636	95.4545	100	64.5161	90.4762	95	100
	47.0588	95	90	95	90.4762		95.2381	96.2963
	64.2857	100	95.2381	100	89.4737		100	100
	65	94.7368	91.6667	90	47.3684		92.5926	94.7368
	56.25	100	90.4762	100	100		96	95.2381
		100	95	100	68.75			100
			95.4545	100	57.8947
			95.2381		78.5714

## Sheet: Figure 5 - figure supplement 1B
Figure 5 - figure supplement 1B- percentage of females crossed to indicated male genotype laying eggs
Female genotype	+/+	+/+	+/+	+/+	+/+	fruitless∆M/+	fruitless∆M-tdTomato/+	fruitless∆M/fruitless∆M-tdTomato
Male genotype	none	+/+	fruitless∆M/+	fruitless∆M-tdTomato/+	fruitless∆M/fruitless∆M-tdTomato	+/+	+/+	+/+
% laying eggs	42.8571	88.2353	80	70.3704	14.2857	88.2353	95.4545	83.3333
	0	95	84.2105	94.7368	9.09091	88.8889	85	87.5
	66.6667	100	100	100	5.26316	94.7368	100	90.4762
	42.8571	100	100	100	0		78.9474	88
	12.5	95	100	91.3043	0		87.5	50
	50	94.4444	100	70.5882	21.0526		100	83.3333
	37.5	94.4444	94.4444	95	33.3333		86.3636	72.2222
		84.2105	89.4737	60	8.33333			68.4211
			95.2381	77.2727	23.0769
			100		11.1111

## Sheet: Figure 5 - figure supplement 1C
Figure 5 - figure supplement 1C- number of inseminated females crossed to indicated male genotype
Female genotype	+/+	+/+	+/+	+/+	+/+	fruitless∆M/+	fruitless∆M-tdTomato/+	fruitless∆M/fruitless∆M-tdTomato
Male genotype	none	+/+	fruitless∆M/+	fruitless∆M-tdTomato/+	fruitless∆M/fruitless∆M-tdTomato	+/+	+/+	+/+
number virgin	10	1	0	0	10	0	0	1
number mated	0	9	10	10	0	10	10	9
