# Supplementary material for: Fruitless mutant male mosquitoes gain attraction to human odor
Source: eLife. 2020 Dec 7;9:e63982. doi: 10.7554/eLife.63982 (PMC7806257; doi:10.7554/eLife.63982)
Supplement: Figure 5—figure supplement 2—source data 1. [file elife-63982-fig5-figsupp2-data1.xlsx]

## Sheet: Figure 5 - figure supplement 2
Figure 5 - figure supplement 2E- Percent females fed on human arm						Number of females fed on human arm
	Fully fed	Partially Fed	Non fed				Fully fed	Partially Fed	Non fed
+/+	85.7881	6.20155	8.01034			+/+	664	48	62
Fruitless∆F/+	4.04624	54.3353	41.6185			Fruitless∆F/+	14	188	144
Figure 5 - figure supplement 2G- Percent inseminated						Number of females inseminated
	Inseminated	Not Inseminated					Inseminated	Not Inseminated
+/+	84	16				+/+	63	12
Fruitless∆F/+	87.2	12.8				Fruitless∆F/+	143	21
Figure 5 - figure supplement 2I- Percent females laying eggs after blood-meal						Number of females laying eggs after blood-meal
	Laid eggs	No eggs					Laid eggs	No eggs
+/+	91.7135	8.28652				+/+	653	59
Fruitless∆F/+	0.495049	99.505				Fruitless∆F/+	1	201
