# Supplementary material for: Fruitless mutant male mosquitoes gain attraction to human odor
Source: eLife. 2020 Dec 7;9:e63982. doi: 10.7554/eLife.63982 (PMC7806257; doi:10.7554/eLife.63982)
Supplement: Figure 5—source data 1. [file elife-63982-fig5-data1.xlsx]

## Sheet: Figure 5B
Figure 5B- Percentage of mosquitoes on Peltier heated to the indicated temperature
	+/+ female (% on Peltier)							+/+ male (% on Peltier)							fruitless∆M/fruitless∆M-tdTomato (% on Peltier)
Temperature (ºC)	trial 1	trial 2	trial 3	trial 4	trial 5	trial 6		trial 1	trial 2	trial 3	trial 4	trial 5	trial 6		trial 1	trial 2	trial 3	trial 4	trial 5	trial 6
40	2.3352	17.811	20.812	21.978	22.484	11.3		0	2.3615	0	2.0408	0	0.068681		1.2626	2.893	0	1.8559	0	0.69522
26	0.022894	0.25183	0	1.4066	0	0		0	4.2553	0	2.0408	0	0		0	0.044853	0	0	0	0
28.5	1.2821	6.1355	0.98677	2.8352	2.5275	2.3889		0	2.1277	0	2.0408	0	0		0.30395	0.089706	0	0	0.022427	0
31	1.511	6.685	6.1673	1.4286	3.2088	11.992		0	2.1277	0	2.0408	0	0		2.3615	0.022427	0	1.2454	0.80736	0.022427
33.5	7.3489	8.1502	9.4192	5.2308	3.4505	9.7229		0	2.1277	0	2.0408	0	0		2.151	1.1886	0	1.1477	0	0.022427
36	6.5705	18.429	9.15	4.7253	8.4835	9.7468		0	2.1277	0	2.0408	0	0		1.964	1.839	0	0.8547	0	0
38.5	13.278	21.955	9.464	7.978	5.4725	11.945		0	2.1277	0	2.0408	0	0		2.8992	4.5526	0	0	0	0.29155
40	14.469	22.39	15.9	8.3516	7.978	11.945		0	2.6187	0	2.0408	0	0		3.0161	2.5118	0	0.80586	0	0.38125
45	18.842	15.156	16.327	6.5275	5.7802	7.0234		0	4.115	0	2.0408	0	0		3.8578	1.8614	0	0.1221	0	0
50	11.538	10.668	11.37	3.4286	3.6264	5.0167		0.022894	2.1277	0.022894	1.0092	0	0		1.0521	0.89706	2.6618	0.02442	0	0
55	5.0366	6.25	3.4537	2.0659	1.978	3.1056		0	0	0	0	0	0		0.42086	0.29155	0	0	0.022427	0.022427
60	3.1136	3.2738	2.6912	2.1978	0.41758	2.0784		0	0	0	0	0	0		0	0	0	0	0	0

## Sheet: Figure 5D
Figure 5D- percentage of mosquitoes entering trap in Quattroport assay
Genotype	+/+	+/+	fruitless∆M/fruitless∆M-tdTomato	fruitless∆M/fruitless∆M-tdTomato	+/+	+/+	fruitless∆M/+	fruitless∆M/+	fruitless∆M-tdTomato/+	fruitless∆M-tdTomato/+	fruitless∆M/fruitless∆M-tdTomato	fruitless∆M/fruitless∆M-tdTomato
Sex	female	female	female	female	male	male	male	male	male	male	male	male
Stimulus	unworn stocking	worn stocking	unworn stocking	worn stocking	unworn stocking	worn stocking	unworn stocking	worn stocking	unworn stocking	worn stocking	unworn stocking	worn stocking
% Attracted	4.5	36.4	0	70	0	0	0	0	0	0	0	26.1
	5	36	5	75	0	0	0	4.8	0	0	0	15
	10.5	54.5	0	57.9	0	0	0	0	0	0	0	36.8
	5.6	61.1	0	65	0	0	0	0	0	0	0	82.4
	4.8	44.4	0	52.4	0	0	0	0	0	0	0	33.3
	0	57.1	0	42.1	0	0	0	0	0	0	0	36.8
	0	65	0	55	0	0	0	0	0	0	0	44.4
	0	42.1	0	47.4	0	5.6	0	0	0	0	0	47.4
	0	72.2	0	52.4	0	0	0	0	0	0	0	44.4
	5.6	72.2	0	70	0	0	0	0	0	0	0	47.6
	0	63.2	0	61.9	0	0					0	52.2
	0	55	0	40	0	0					0	26.1
	0	66.7
	5	77.8
	0	63.2
	0	52.4
	0	68.4
	0	57.9
	0	50
	0	63.2
	5.3	50
	0	60
	0	63.2
	0	80
	0	38.1
	0	63.2
	0	42.9
	5.3	50
