# Supplementary material for: Fruitless mutant male mosquitoes gain attraction to human odor
Source: eLife. 2020 Dec 7;9:e63982. doi: 10.7554/eLife.63982 (PMC7806257; doi:10.7554/eLife.63982)
Supplement: Supplementary file 1. [file elife-63982-supp1.xlsx]

## Sheet: Sheet1
Construct	Purpose	#hatched/injected	#G1 families verified hits	Hit rate (%)	Notes
		(% eggs hatched)
SUCCESSFUL FRUITLESS M CONSTRUCTS
fruitless∆M-T2A-CsChrimson-tdTomato	Disrupt FruitlessM and express a fusion protein to label and optogenetically activate fruitless neurons in fruitlessM mutant males	820/2000 (41%)	4	0.97	Viable line. CsChrimson-tdTomato was not detectable in the brain without antibody amplification from antibody staining, suggesting that expression is too low for optogenetic stimulation
fruitless∆M	Disrupt FruitlessM	376/2000 (20%)	1	0.53	Viable line. Resulted from imprecise insertion of the fruitless∆M-T2A-QF2 construct at the fruitless locus
ATTEMPTED FRUITLESS M CONSTRUCTS
fruitless∆M-T2A-QF2	Disrupt FruitlessM and express the bipartite Q system in fruitless neurons (regular QF2)	376/2000 (20%)	7	4.43	All males did not mate, all females did not blood-feed
fruitless∆M-T2A-QF2w	Disrupt FruitlessM and express the bipartite Q system in fruitless neurons (attenuated QF2)	462/2000 (22%)	6	2.61	All males did not mate, all females did not blood-feed. In G0s crossed to QUAS-CD8-GFP, saw labeling in G1 brains that resembled fruitless∆M-tdTomato expression
fruitless∆M-T2A-GCaMP6s-T2A-TdTomato-T2A-3XFLAG-DsRed-NLS	Disrupt FruitlessM and express cytoplasmic and nuclear markers and GCaMP for calcium imaging	349/2000 (16%)	4	1.15	Viable line but weak marker
ATTEMPTED FRUITLESS F CONSTRUCTS
fruitless∆F	Force expression of FruitlessM in females (unmarked allele)	205/1000 (20%)	G1s pooled for quick screening	?	G1 males pooled and crossed to +/+ females for PCR screening. G2 females had blood-feeding defects and did not lay eggs
fruitless∆F-dsRed-3XP3	Force expression of FruitlessM in females (marked allele)	740/2000 (37%)	6	1.6	G1/G2 Females blood-fed normally. We suspect that the 3xP3 insertion interferes with splicing
