# Supplementary material for: Fruitless mutant male mosquitoes gain attraction to human odor
Source: eLife. 2020 Dec 7;9:e63982. doi: 10.7554/eLife.63982 (PMC7806257; doi:10.7554/eLife.63982)
Supplement: Supplementary file 2. [file elife-63982-supp2.xlsx]

## Sheet: Primer details
Plasmid construction details and primer sequences
name	guide sequence	full sgRNA sequence	cut site location	component	length (bp)	distance from guide cut site (bp)	sequence	source	forward primer sequence	reverse primer sequence	genomic location
Fruitless∆-T2A-QF2-hsp70term-3XP3-dsRed-SV40	CGCACCGAAGGTATGTTGAG	GAAATTAATACGACTCACTATAGGCGCACCGAAGGTATGTTGAGGTTTTAGAGCTAGAAATAGCAAGTTAAAATAAGGCTAGTCCGTTATCAACTTGAAAAAGTGGCACCGAGTCGGTGCTTTT	chr1:121093154	total	7461		TCGCGCGTTTCGGTGATGACGGTGAAAACCTCTGACACATGCAGCTCCCGGAGACGGTCACAGCTTGTCTGTAAGCGGATGCCGGGAGCAGACAAGCCCGTCAGGGCGCGTCAGCGGGTGTTGGCGGGTGTCGGGGCTGGCTTAACTATGCGGCATCAGAGCAGATTGTACTGAGAGTGCACCATATGCGGTGTGAAATACCGCACAGATGCGTAAGGAGAAAATACCGCATCAGGCGCCATTCGCCATTCAGGCTGCGCAACTGTTGGGAAGGGCGATCGGTGCGGGCCTCTTCGCTATTACGCCAGCTGGCGAAAGGGGGATGTGCTGCAAGGCGATTAAGTTGGGTAACGCCAGGGTTTTCCCAGTCACGACGTTGTAAAACGACGGCCAGTGAAT…	-
				pUC19 backbone	2680	-	TCGCGCGTTTCGGTGATGACGGTGAAAACCTCTGACACATGCAGCTCCCGGAGACGGTCACAGCTTGTCTGTAAGCGGATGCCGGGAGCAGACAAGCCCGTCAGGGCGCGTCAGCGGGTGTTGGCGGGTGTCGGGGCTGGCTTAACTATGCGGCATCAGAGCAGATTGTACTGAGAGTGCACCATATGCGGTGTGAAATACCGCACAGATGCGTAAGGAGAAAATACCGCATCAGGCGCCATTCGCCATTCAGGCTGCGCAACTGTTGGGAAGGGCGATCGGTGCGGGCCTCTTCGCTATTACGCCAGCTGGCGAAAGGGGGATGTGCTGCAAGGCGATTAAGTTGGGTAACGCCAGGGTTTTCCCAGTCACGACGTTGTAAAACGACGGCCAGTGAAT…	pUC19	TCGCGCGTTTCGGTGATG	GGCCTCGTGATACGCCTATTT
				left arm	800	-13	GCTCATTATTATTGGTACCGGAATGGAGGCTATCCATTCCAATGATGGACCGGAATAAATCTTCTTTTCCCAGCAGCGCATTTGCATCGCCGTATACTATTTTCACATCTTGTTTTGGGGACTCTCCATATACCTTATCTAGACTCTCATAGAACTCATCCTTCATGTCATCCGGCTTATCGTTCTTTGGCACATATATAGTGAACATTTTGTAGATGAAGAACTTGTCCTTCATTTACAACACACAGATTCGGTTGCTTAACGGTTTCCATCAAATAACTCGCGTCATCTGCTTCGCAATCACTATGAAGCCAACTCCACGTTGGTATTGCTCTGTTGCCGCCGCTGTAGTAGATGTGGTACTTGAATGAAGTGTTGGCGATGCACCGTTTCGTGTTC…	LVP gDNA	GCGTATCACGAGGCCTCGCTCATTATTATTGGTACCGG	TGCCCTCTCCGTGCGATTGAAGCTTACGAC	chr1:121092342-121093141
				t2a-qf2-hsp70-3xp3-dsred-sv40	2569	-	GGAGAGGGCAGAGGAAGTCTTCTAACATGCGGTGACGTGGAGGAGAATCCCGGCCCTATGCCACCCAAGCGCAAAACGCTTAACGCTGCGGCTGAGGCTAACGCTCATGCCGACGGACACGCCGACGGAAACGCCGACGGACACGTGGCCAATACGGCCGCGTCCTCGAATAATGCGAGGTTCGCTGATCTCACTAACATCGATACTCCGGGTCTGGGACCCACAACTACGACCCTGCTCGTGGAACCAGCACGCTCAAAGCGTCAACGAGTGTCCCGCGCATGCGACCAGTGCCGTGCAGCCCGAGAGAAATGCGACGGAATACAGCCTGCGTGTTTCCCGTGCGTTTCCCAGGGAAGGTCCTGCACTTATCAGGCTTCGCCGAAAAAGAGGGGAGTT…	ppk10779-t2a-qf2	TCAATCGCACGGAGAGGGCAGAGGAAGTC	AACCCCGCTCTAAGATACATTGATGAGTTTGGACA
				right arm	1412	0	GAGCGGGGTTTCCATAGACACAAAATTAAGGCGAGAAATCGCCAACCGTATAACCATTGCTGATCTTACCAGCACACATCATCATGGAATCTTCTGACCGATCGCGTCATCGATCGTGTCTTGTACATTTACCATGCGAGCTTGAATCAAGGGAAACACACATATGTACTATAAAAAAATAAAGAAATGATAAATCTTGCAATGAATATACCTTATCTAATAAATATAACAATCAAAAAAACGCCAGCCGTCTATCAAAGATGAGAAATCAAATACACCTGCAAACATTTGATATCCTGTAAAAAAAACGAAAAGCAGTACTAATAGACAAATACGATAATAATATACGATAATAACGTCAAACGTAGCAGCAATTCAGGTTAACCATTTTATCAAAGT…	LVP gDNA	ATGTATCTTAGAGCGGGGTTTCCATAGACA	GTCATCACCGAAACGCGCGAGGCAAACAGTGGCGAAGCC	chr1:121093154-121094565
notes: animals inviable, recovered one out-of-frame insertion- fruitless∆ allele
Fruitless∆-T2A-CsChrimson-tdTomato-SV40-3XP3-EYFP-SV40	CGCACCGAAGGTATGTTGAG	GAAATTAATACGACTCACTATAGGCGCACCGAAGGTATGTTGAGGTTTTAGAGCTAGAAATAGCAAGTTAAAATAAGGCTAGTCCGTTATCAACTTGAAAAAGTGGCACCGAGTCGGTGCTTTT	chr1:121093154	total	9527		AATTCGAGCTCGCCCGGGGATCTAATTCAATTAGAGACTAATTCAATTAGAGCTAATTCAATTAGGATCCAAGCTTATCGATTTCGAACCCTCGACCGCCGGAGTATAAATAGAGGCGCTTCGTCTACGGAGCGACAATTCAATTCAAACAAGCAAAGTGAACACGTCGCTAAGCGAAAGCTAAGCAAATAAACAAGCGCAGCTGAACAAGCTAAACAATCGGGGTACCGCTAGAGTCGACGGTACCGCGGGCCCGGGATCCACCGGTCGCCACCATGGTGAGCAAGGGCGAGGAGCTGTTCACCGGGGTGGTGCCCATCCTGGTCGAGCTGGACGGCGACGTAAACGGCCACAAGTTCAGCGTGTCCGGCGAGGGCGAGGGCGATGCCACCTACGGCA…	-
				pUC19 backbone	2680	-	TCGCGCGTTTCGGTGATGACGGTGAAAACCTCTGACACATGCAGCTCCCGGAGACGGTCACAGCTTGTCTGTAAGCGGATGCCGGGAGCAGACAAGCCCGTCAGGGCGCGTCAGCGGGTGTTGGCGGGTGTCGGGGCTGGCTTAACTATGCGGCATCAGAGCAGATTGTACTGAGAGTGCACCATATGCGGTGTGAAATACCGCACAGATGCGTAAGGAGAAAATACCGCATCAGGCGCCATTCGCCATTCAGGCTGCGCAACTGTTGGGAAGGGCGATCGGTGCGGGCCTCTTCGCTATTACGCCAGCTGGCGAAAGGGGGATGTGCTGCAAGGCGATTAAGTTGGGTAACGCCAGGGTTTTCCCAGTCACGACGTTGTAAAACGACGGCCAGTGAAT…	Fru∆-T2A-QF2-hsp70term-3XP3-dsRed-SV40	atacgcgtacggcgcGAGCGGGGTTTCCATAGAC	gaccagtctgctcatAGGGCCGGGATTCTCCTC	-
				left arm	800	-13	GCTCATTATTATTGGTACCGGAATGGAGGCTATCCATTCCAATGATGGACCGGAATAAATCTTCTTTTCCCAGCAGCGCATTTGCATCGCCGTATACTATTTTCACATCTTGTTTTGGGGACTCTCCATATACCTTATCTAGACTCTCATAGAACTCATCCTTCATGTCATCCGGCTTATCGTTCTTTGGCACATATATAGTGAACATTTTGTAGATGAAGAACTTGTCCTTCATTTACAACACACAGATTCGGTTGCTTAACGGTTTCCATCAAATAACTCGCGTCATCTGCTTCGCAATCACTATGAAGCCAACTCCACGTTGGTATTGCTCTGTTGCCGCCGCTGTAGTAGATGTGGTACTTGAATGAAGTGTTGGCGATGCACCGTTTCGTGTTC…	Fru∆-T2A-QF2-hsp70term-3XP3-dsRed-SV40	atacgcgtacggcgcGAGCGGGGTTTCCATAGAC	gaccagtctgctcatAGGGCCGGGATTCTCCTC	chr1:121092342-121093141
				t2a	57		GGAGAGGGCAGAGGAAGTCTTCTAACATGCGGTGACGTGGAGGAGAATCCCGGCCCT	Fru∆-T2A-QF2-hsp70term-3XP3-dsRed-SV40	atacgcgtacggcgcGAGCGGGGTTTCCATAGAC	gaccagtctgctcatAGGGCCGGGATTCTCCTC	-
				CsChrimson-tdTomato-SV40	3314		ATGAGCAGACTGGTCGCCGCTTCTTGGCTGCTGGCTCTCCTCCTCTGCGGAATTACCAGCACAACAACAGCCTCTAGCGCCCCAGCAGCTTCTTCTACAGACGGAACAGCCGCCGCAGCAGTGTCTCACTACGCCATGAACGGCTTCGACGAGCTGGCTAAAGGAGCCGTGGTGCCAGAAGACCACTTTGTCTGCGGACCAGCCGACAAGTGCTATTGCTCCGCTTGGCTGCACAGCAGAGGCACACCAGGAGAAAAGATCGGCGCCCAGGTCTGCCAGTGGATTGCTTTCAGCATCGCCATCGCCCTGCTGACATTCTACGGCTTCAGCGCCTGGAAGGCCACTTGCGGTTGGGAGGAGGTCTACGTCTGTTGCGTCGAGGTGCTGTTCGTGACCCTG…	p20x-UAS-CsChrimson-tdT (Jayaraman lab)	gagaatcccggccctATGAGCAGACTGGTCGCC	gggcgagctcgaattTTTAAACGGCCGGCCAGATC	-
notes: recovered multiple hits, one of which was fruitless∆tdtomato allele				3XP3-EYFP-SV40	1264	-	AATTCGAGCTCGCCCGGGGATCTAATTCAATTAGAGACTAATTCAATTAGAGCTAATTCAATTAGGATCCAAGCTTATCGATTTCGAACCCTCGACCGCCGGAGTATAAATAGAGGCGCTTCGTCTACGGAGCGACAATTCAATTCAAACAAGCAAAGTGAACACGTCGCTAAGCGAAAGCTAAGCAAATAAACAAGCGCAGCTGAACAAGCTAAACAATCGGGGTACCGCTAGAGTCGACGGTACCGCGGGCCCGGGATCCACCGGTCGCCACCATGGTGAGCAAGGGCGAGGAGCTGTTCACCGGGGTGGTGCCCATCCTGGTCGAGCTGGACGGCGACGTAAACGGCCACAAGTTCAGCGTGTCCGGCGAGGGCGAGGGCGATGCCACCTACGGCA…	Addgene #62291 pDSAY	ggccggccgtttaaaAATTCGAGCTCGCCCGGG	atggaaaccccgctcGCGCCGTACGCGTATCGATAAG	-
				right arm	1412	0	GAGCGGGGTTTCCATAGACACAAAATTAAGGCGAGAAATCGCCAACCGTATAACCATTGCTGATCTTACCAGCACACATCATCATGGAATCTTCTGACCGATCGCGTCATCGATCGTGTCTTGTACATTTACCATGCGAGCTTGAATCAAGGGAAACACACATATGTACTATAAAAAAATAAAGAAATGATAAATCTTGCAATGAATATACCTTATCTAATAAATATAACAATCAAAAAAACGCCAGCCGTCTATCAAAGATGAGAAATCAAATACACCTGCAAACATTTGATATCCTGTAAAAAAAACGAAAAGCAGTACTAATAGACAAATACGATAATAATATACGATAATAACGTCAAACGTAGCAGCAATTCAGGTTAACCATTTTATCAAAGT…	Fru∆-T2A-QF2-hsp70term-3XP3-dsRed-SV40	atacgcgtacggcgcGAGCGGGGTTTCCATAGAC	gaccagtctgctcatAGGGCCGGGATTCTCCTC	chr1:121093154-121094565
Fruitless∆-T2A-GCaMP6s-T2A-tdTomato-T2A-3XFLAG-dsRed-NLS-SV40-3XP3-dsRed-SV40	CGCACCGAAGGTATGTTGAG	GAAATTAATACGACTCACTATAGGCGCACCGAAGGTATGTTGAGGTTTTAGAGCTAGAAATAGCAAGTTAAAATAAGGCTAGTCCGTTATCAACTTGAAAAAGTGGCACCGAGTCGGTGCTTTT	chr1:121093154	total	10047		AATTCGAGCTCGCCCGGGGATCTAATTCAATTAGAGACTAATTCAATTAGAGCTAATTCAATTAGGATCCAAGCTTATCGATTTCGAACCCTCGACCGCCGGAGTATAAATAGAGGCGCTTCGTCTACGGAGCGACAATTCAATTCAAACAAGCAAAGTGAACACGTCGCTAAGCGAAAGCTAAGCAAATAAACAAGCGCAGCTGAACAAGCTAAACAATCGGGGTACCGCTAGAGTCGACGGTACCGCGGGCCCGGGATCCACCGGTCGCCACCATGGCCTCCTCCGAGAACGTCATCACCGAGTTCATGCGCTTCAAGGTGCGCATGGAGGGCACCGTGAACGGCCACGAGTTCGAGATCGAGGGCGAGGGCGAGGGCCGCCCCTACGAGGGCCACA…	-
				pUC19 backbone	2680	-	TCGCGCGTTTCGGTGATGACGGTGAAAACCTCTGACACATGCAGCTCCCGGAGACGGTCACAGCTTGTCTGTAAGCGGATGCCGGGAGCAGACAAGCCCGTCAGGGCGCGTCAGCGGGTGTTGGCGGGTGTCGGGGCTGGCTTAACTATGCGGCATCAGAGCAGATTGTACTGAGAGTGCACCATATGCGGTGTGAAATACCGCACAGATGCGTAAGGAGAAAATACCGCATCAGGCGCCATTCGCCATTCAGGCTGCGCAACTGTTGGGAAGGGCGATCGGTGCGGGCCTCTTCGCTATTACGCCAGCTGGCGAAAGGGGGATGTGCTGCAAGGCGATTAAGTTGGGTAACGCCAGGGTTTTCCCAGTCACGACGTTGTAAAACGACGGCCAGTGAAT…	Fru∆-T2A-QF2-hsp70term-3XP3-dsRed-SV40	tcaatgtatcttaAATTCGAGCTCGCCCGGG	gatgagaacccatAGGGCCGGGATTCTCCTC	-
				left arm	800	-13	GCTCATTATTATTGGTACCGGAATGGAGGCTATCCATTCCAATGATGGACCGGAATAAATCTTCTTTTCCCAGCAGCGCATTTGCATCGCCGTATACTATTTTCACATCTTGTTTTGGGGACTCTCCATATACCTTATCTAGACTCTCATAGAACTCATCCTTCATGTCATCCGGCTTATCGTTCTTTGGCACATATATAGTGAACATTTTGTAGATGAAGAACTTGTCCTTCATTTACAACACACAGATTCGGTTGCTTAACGGTTTCCATCAAATAACTCGCGTCATCTGCTTCGCAATCACTATGAAGCCAACTCCACGTTGGTATTGCTCTGTTGCCGCCGCTGTAGTAGATGTGGTACTTGAATGAAGTGTTGGCGATGCACCGTTTCGTGTTC…	Fru∆-T2A-QF2-hsp70term-3XP3-dsRed-SV40	tcaatgtatcttaAATTCGAGCTCGCCCGGG	gatgagaacccatAGGGCCGGGATTCTCCTC	chr1:121092342-121093141
				t2a	57	-	GGAGAGGGCAGAGGAAGTCTTCTAACATGCGGTGACGTGGAGGAGAATCCCGGCCCT	Fru∆-T2A-QF2-hsp70term-3XP3-dsRed-SV40	tcaatgtatcttaAATTCGAGCTCGCCCGGG	gatgagaacccatAGGGCCGGGATTCTCCTC	-
				GCaMP6s	1359		ATGGGTTCTCATCATCATCATCATCATGGTATGGCTAGCATGACTGGTGGACAGCAAATGGGTCGGGATCTGTACGACGATGACGATAAGGATCTCGCCACCATGGTCGACTCATCACGTCGTAAGTGGAATAAGACAGGTCACGCAGTCAGAGCTATAGGTCGGCTGAGCTCACTCGAGAACGTCTATATCAAGGCCGACAAGCAGAAGAACGGCATCAAGGCGAACTTCCACATCCGCCACAACATCGAGGACGGCGGCGTGCAGCTCGCCTACCACTACCAGCAGAACACCCCCATCGGCGACGGCCCCGTGCTGCTGCCCGACAACCACTACCTGAGCGTGCAGTCCAAACTTTCGAAAGACCCCAACGAGAAGCGCGATCACATGGTCCTGCTG…	QUAS-tdTomato-T2A-GCaMP6S	ATCCCGGCCCTATGGGTT	TCACCGCATGTTAGAAGACTTCCTCTGCCCTCTCCCTTCGCTGTCATCATTTGTACAAAC	-
				T2A-tdTomato	1509		GGAGAGGGCAGAGGAAGTCTTCTAACATGCGGTGACGTGGAGGAGAATCCCGGCCCTATGGGTGTTAGCAAGGGTGAAGAGGTGATTAAAGAGTTTATGCGTTTTAAAGTACGCATGGAGGGTAGCATGAACGGTCATGAGTTTGAGATCGAGGGCGAAGGCGAAGGTCGTCCGTACGAGGGTACGCAGACCGCTAAACTGAAAGTAACCAAAGGCGGTCCTCTGCCGTTCGCGTGGGACATCCTGTCCCCGCAGTTTATGTATGGTTCCAAGGCCTACGTCAAACACCCAGCCGATATCCCGGACTACAAGAAGCTGTCTTTCCCGGAGGGTTTCAAGTGGGAGCGTGTAATGAACTTTGAGGACGGTGGCCTGGTTACCGTCACCCAGGATAGCTCT…	p20x-UAS-CsChrimson-tdT (Jayaraman lab)	AGAGGAAGTCTTCTAACATGCGGTGACGTGGAGGAGAATCCCGGCCCTATGGGTGTTAGCAAGGGTGAAGA	TTGTAATCAATATCATGATCCTTGTAGTCTCCGTCGTGGTCCTTATAGTCAGGGCCGGGATTCTCCTCCACGTCACCGCATGTTAGAAGACTTCCTCTGCCCTCTCCCACCTCGTTCTCGTAGCAGA	-
notes: expression too weak to use as reporter				T2A-3XFLAG-dsRed-NLS-SV40	1068		GGAGAGGGCAGAGGAAGTCTTCTAACATGCGGTGACGTGGAGGAGAATCCCGGCCCTGACTATAAGGACCACGACGGAGACTACAAGGATCATGATATTGATTACAAAGACGATGACGATAAGATGGCCTCCTCCGAGAACGTCATCACCGAGTTCATGCGCTTCAAGGTGCGCATGGAGGGCACCGTGAACGGCCACGAGTTCGAGATCGAGGGCGAGGGCGAGGGCCGCCCCTACGAGGGCCACAACACCGTGAAGCTGAAGGTGACCAAGGGCGGCCCCCTGCCCTTCGCCTGGGACATCCTGTCCCCCCAGTTCCAGTACGGCTCCAAGGTGTACGTGAAGCACCCCGCCGACATCCCCGACTACAAGAAGCTGTCCTTCCCCGAGGGCTTCAAG…	PUb-CD8-GFP-T2A-DsRedNLS	TAAATTCTGCTACGAGAACGAGGTGGGAGAGGGCAGAGGAAGTCTTCTAACATGCGGTGACGTGGAGGAGAATCCCGGCCCTGACTATAAGGACCACGACGGAGACTACAAGGATCATGATATTGATTACAAAGACGATGACGATAAGATGGCCTCCTCCGAGAACGTCATCAC	TAAGATACATTGATGAGTTTGGACAAAC	-
				3xp3-dsred-sv40	1195		AATTCGAGCTCGCCCGGGGATCTAATTCAATTAGAGACTAATTCAATTAGAGCTAATTCAATTAGGATCCAAGCTTATCGATTTCGAACCCTCGACCGCCGGAGTATAAATAGAGGCGCTTCGTCTACGGAGCGACAATTCAATTCAAACAAGCAAAGTGAACACGTCGCTAAGCGAAAGCTAAGCAAATAAACAAGCGCAGCTGAACAAGCTAAACAATCGGGGTACCGCTAGAGTCGACGGTACCGCGGGCCCGGGATCCACCGGTCGCCACCATGGCCTCCTCCGAGAACGTCATCACCGAGTTCATGCGCTTCAAGGTGCGCATGGAGGGCACCGTGAACGGCCACGAGTTCGAGATCGAGGGCGAGGGCGAGGGCCGCCCCTACGAGGGCCACA…	Fru∆-T2A-QF2-hsp70term-3XP3-dsRed-SV40	tcaatgtatcttaAATTCGAGCTCGCCCGGG	gatgagaacccatAGGGCCGGGATTCTCCTC	-
				right arm	1412	0	GAGCGGGGTTTCCATAGACACAAAATTAAGGCGAGAAATCGCCAACCGTATAACCATTGCTGATCTTACCAGCACACATCATCATGGAATCTTCTGACCGATCGCGTCATCGATCGTGTCTTGTACATTTACCATGCGAGCTTGAATCAAGGGAAACACACATATGTACTATAAAAAAATAAAGAAATGATAAATCTTGCAATGAATATACCTTATCTAATAAATATAACAATCAAAAAAACGCCAGCCGTCTATCAAAGATGAGAAATCAAATACACCTGCAAACATTTGATATCCTGTAAAAAAAACGAAAAGCAGTACTAATAGACAAATACGATAATAATATACGATAATAACGTCAAACGTAGCAGCAATTCAGGTTAACCATTTTATCAAAGT…	Fru∆-T2A-QF2-hsp70term-3XP3-dsRed-SV40	tcaatgtatcttaAATTCGAGCTCGCCCGGG	gatgagaacccatAGGGCCGGGATTCTCCTC	chr1:121093154-121094565
Fruitless∆-T2A-QF2w-hsp70term-3XP3-dsRed-SV40	CGCACCGAAGGTATGTTGAG	GAAATTAATACGACTCACTATAGGCGCACCGAAGGTATGTTGAGGTTTTAGAGCTAGAAATAGCAAGTTAAAATAAGGCTAGTCCGTTATCAACTTGAAAAAGTGGCACCGAGTCGGTGCTTTT	chr1:121093154	total	7467		AATTCGAGCTCGCCCGGGGATCTAATTCAATTAGAGACTAATTCAATTAGAGCTAATTCAATTAGGATCCAAGCTTATCGATTTCGAACCCTCGACCGCCGGAGTATAAATAGAGGCGCTTCGTCTACGGAGCGACAATTCAATTCAAACAAGCAAAGTGAACACGTCGCTAAGCGAAAGCTAAGCAAATAAACAAGCGCAGCTGAACAAGCTAAACAATCGGGGTACCGCTAGAGTCGACGGTACCGCGGGCCCGGGATCCACCGGTCGCCACCATGGCCTCCTCCGAGAACGTCATCACCGAGTTCATGCGCTTCAAGGTGCGCATGGAGGGCACCGTGAACGGCCACGAGTTCGAGATCGAGGGCGAGGGCGAGGGCCGCCCCTACGAGGGCCACA…	-	(site directed mutagenesis)
				pUC19 backbone	2680	-	TCGCGCGTTTCGGTGATGACGGTGAAAACCTCTGACACATGCAGCTCCCGGAGACGGTCACAGCTTGTCTGTAAGCGGATGCCGGGAGCAGACAAGCCCGTCAGGGCGCGTCAGCGGGTGTTGGCGGGTGTCGGGGCTGGCTTAACTATGCGGCATCAGAGCAGATTGTACTGAGAGTGCACCATATGCGGTGTGAAATACCGCACAGATGCGTAAGGAGAAAATACCGCATCAGGCGCCATTCGCCATTCAGGCTGCGCAACTGTTGGGAAGGGCGATCGGTGCGGGCCTCTTCGCTATTACGCCAGCTGGCGAAAGGGGGATGTGCTGCAAGGCGATTAAGTTGGGTAACGCCAGGGTTTTCCCAGTCACGACGTTGTAAAACGACGGCCAGTGAAT…	Fru∆-T2A-QF2-hsp70term-3XP3-dsRed-SV40			-
				left arm	800	-13	GCTCATTATTATTGGTACCGGAATGGAGGCTATCCATTCCAATGATGGACCGGAATAAATCTTCTTTTCCCAGCAGCGCATTTGCATCGCCGTATACTATTTTCACATCTTGTTTTGGGGACTCTCCATATACCTTATCTAGACTCTCATAGAACTCATCCTTCATGTCATCCGGCTTATCGTTCTTTGGCACATATATAGTGAACATTTTGTAGATGAAGAACTTGTCCTTCATTTACAACACACAGATTCGGTTGCTTAACGGTTTCCATCAAATAACTCGCGTCATCTGCTTCGCAATCACTATGAAGCCAACTCCACGTTGGTATTGCTCTGTTGCCGCCGCTGTAGTAGATGTGGTACTTGAATGAAGTGTTGGCGATGCACCGTTTCGTGTTC…	Fru∆-T2A-QF2-hsp70term-3XP3-dsRed-SV40			chr1:121092342-121093141
				t2a-qf2w-hsp70-3xp3-dsred-sv40	2569	-		Fru∆-T2A-QF2-hsp70term-3XP3-dsRed-SV40	aagaaaTGATGACGTCTATCGATAC	ctttttGTATGTATTAATGTCGGAG	-
				right arm	1412	0	GAGCGGGGTTTCCATAGACACAAAATTAAGGCGAGAAATCGCCAACCGTATAACCATTGCTGATCTTACCAGCACACATCATCATGGAATCTTCTGACCGATCGCGTCATCGATCGTGTCTTGTACATTTACCATGCGAGCTTGAATCAAGGGAAACACACATATGTACTATAAAAAAATAAAGAAATGATAAATCTTGCAATGAATATACCTTATCTAATAAATATAACAATCAAAAAAACGCCAGCCGTCTATCAAAGATGAGAAATCAAATACACCTGCAAACATTTGATATCCTGTAAAAAAAACGAAAAGCAGTACTAATAGACAAATACGATAATAATATACGATAATAACGTCAAACGTAGCAGCAATTCAGGTTAACCATTTTATCAAAGT…	Fru∆-T2A-QF2-hsp70term-3XP3-dsRed-SV40			chr1:121093154-121094565
notes: animals inviable, G0s crossed to QUAS-CD8-GFP, G1s have labeled brains
Fruitless∆female	CGCACCGAAGGTATGTTGAG	GAAATTAATACGACTCACTATAGGCGCACCGAAGGTATGTTGAGGTTTTAGAGCTAGAAATAGCAAGTTAAAATAAGGCTAGTCCGTTATCAACTTGAAAAAGTGGCACCGAGTCGGTGCTTTT	chr1:121093154	total	200		ATTACAATAACCGTTACCCGGCATTGAACGGCTATCCCCAGATCAACGGTGTCGACCCGGCAGAACCCATCGATTGTCGTAAGCTTCAATCGCACCGAAGGTAAGTACTTTGGTGGGAGTCACTCACGACGTTTTTTTTGGGTGACTAAACTCCGGTAGACAATCATGGTGGTCTCCTTGGTGAATGCAAATCGGAATAA	ssODN
	ACGGCTGGTAAGTACTTTGG	GAAATTAATACGACTCACTATAGGACGGCTGGTAAGTACTTTGGGTTTTAGAGCTAGAAATAGCAAGTTAAAATAAGGCTAGTCCGTTATCAACTTGAAAAAGTGGCACCGAGTCGGTGCTTTT	chr1:121094456	left arm	100		ATTACAATAACCGTTACCCGGCATTGAACGGCTATCCCCAGATCAACGGTGTCGACCCGGCAGAACCCATCGATTGTCGTAAGCTTCAATCGCACCGAAG	ssODN			chr1:121093046-121093146
				right arm	100		GTAAGTACTTTGGTGGGAGTCACTCACGACGTTTTTTTTGGGTGACTAAACTCCGGTAGACAATCATGGTGGTCTCCTTGGTGAATGCAAATCGGAATAA	ssODN			chr1:121094445-121094545
notes: females did not feed or lay eggs, line inviable
Fruitless∆female-intronic-SV40-dsRed-3XP3	CGCACCGAAGGTATGTTGAG	GAAATTAATACGACTCACTATAGGCGCACCGAAGGTATGTTGAGGTTTTAGAGCTAGAAATAGCAAGTTAAAATAAGGCTAGTCCGTTATCAACTTGAAAAAGTGGCACCGAGTCGGTGCTTTT	chr1:121093154	total	5330		TCGCGCGTTTCGGTGATGACGGTGAAAACCTCTGACACATGCAGCTCCCGGAGACGGTCACAGCTTGTCTGTAAGCGGATGCCGGGAGCAGACAAGCCCGTCAGGGCGCGTCAGCGGGTGTTGGCGGGTGTCGGGGCTGGCTTAACTATGCGGCATCAGAGCAGATTGTACTGAGAGTGCACCATATGCGGTGTGAAATACCGCACAGATGCGTAAGGAGAAAATACCGCATCAGGCGCCATTCGCCATTCAGGCTGCGCAACTGTTGGGAAGGGCGATCGGTGCGGGCCTCTTCGCTATTACGCCAGCTGGCGAAAGGGGGATGTGCTGCAAGGCGATTAAGTTGGGTAACGCCAGGGTTTTCCCAGTCACGACGTTGTAAAACGACGGCCAGTGAAT…	-
	ACGGCTGGTAAGTACTTTGG	GAAATTAATACGACTCACTATAGGACGGCTGGTAAGTACTTTGGGTTTTAGAGCTAGAAATAGCAAGTTAAAATAAGGCTAGTCCGTTATCAACTTGAAAAAGTGGCACCGAGTCGGTGCTTTT	chr1:121094456	pUC19 backbone	2680	-	TCGCGCGTTTCGGTGATGACGGTGAAAACCTCTGACACATGCAGCTCCCGGAGACGGTCACAGCTTGTCTGTAAGCGGATGCCGGGAGCAGACAAGCCCGTCAGGGCGCGTCAGCGGGTGTTGGCGGGTGTCGGGGCTGGCTTAACTATGCGGCATCAGAGCAGATTGTACTGAGAGTGCACCATATGCGGTGTGAAATACCGCACAGATGCGTAAGGAGAAAATACCGCATCAGGCGCCATTCGCCATTCAGGCTGCGCAACTGTTGGGAAGGGCGATCGGTGCGGGCCTCTTCGCTATTACGCCAGCTGGCGAAAGGGGGATGTGCTGCAAGGCGATTAAGTTGGGTAACGCCAGGGTTTTCCCAGTCACGACGTTGTAAAACGACGGCCAGTGAAT…	Fru∆-T2A-QF2-hsp70term-3XP3-dsRed-SV40	gttcagtgacttcTCGCGCGTTTCGGTGATG	CGTCGTGAGTGACTCGCAGCAAAGTACTTACCTTCGGTGCGATTGAAGCTTACGACAAT	-
				left arm	836	20	GCTCATTATTATTGGTACCGGAATGGAGGCTATCCATTCCAATGATGGACCGGAATAAATCTTCTTTTCCCAGCAGCGCATTTGCATCGCCGTATACTATTTTCACATCTTGTTTTGGGGACTCTCCATATACCTTATCTAGACTCTCATAGAACTCATCCTTCATGTCATCCGGCTTATCGTTCTTTGGCACATATATAGTGAACATTTTGTAGATGAAGAACTTGTCCTTCATTTACAACACACAGATTCGGTTGCTTAACGGTTTCCATCAAATAACTCGCGTCATCTGCTTCGCAATCACTATGAAGCCAACTCCACGTTGGTATTGCTCTGTTGCCGCCGCTGTAGTAGATGTGGTACTTGAATGAAGTGTTGGCGATGCACCGTTTCGTGTTC…	Fru∆-T2A-QF2-hsp70term-3XP3-dsRed-SV40	gttcagtgacttcTCGCGCGTTTCGGTGATG	CGTCGTGAGTGACTCGCAGCAAAGTACTTACCTTCGGTGCGATTGAAGCTTACGACAAT	chr1:121092342-121093149
				sv40-dsred-3xp3	1195	-	TAAGATACATTGATGAGTTTGGACAAACCACAACTAGAATGCAGTGAAAAAAATGCTTTATTTGTGAAATTTGTGATGCTATTGCTTTATTTGTAACCATTATAAGCTGCAATAAACAAGTTAACAACAACAATTGCATTCATTTTATGTTTCAGGTTCAGGGGGAGGTGTGGGAGGTTTTTTAAAGCAAGTAAAACCTCTACAAATGTGGTATGGCTGATTATGATCTAGAGTCGCGGCCGCTACAGGAACAGGTGGTGGCGGCCCTCGGTGCGCTCGTACTGCTCCACGATGGTGTAGTCCTCGTTGTGGGAGGTGATGTCCAGCTTGGCGTCCACGTAGTAGTAGCCGGGCAGCTGCACGGGCTTCTTGGCCATGTAGATGGACTTGAACTCCACC…	Fru∆-T2A-QF2-hsp70term-3XP3-dsRed-SV40	ACTTTGCTGCGAgtcactcacgacgTAAGATACATTGATGAGTTTGGACAAACCAC	TACCGGAGTTTAGTcacccaaaaaaaaAATTCGAGCTCGCCCGGG	-
				right arm	619	21	TTTTTTTTGGGTGACTAAACTCCGGTAGACAATCATGGTGGTCTCCTTGGTGAATGCAAATCGGAATAATGGCTTCGCCACTGTTTGCCGGGTTCATCATAACACGTGCAACAGGAAGCTCCCGATGTCATTCTACCGAGGGGTGGGGTAACAGGTCTACATGAGGGAAAAGGGGATTGAAAACTAAATCGTTCTTTCAAACGGGTTCTAGGTGACGGGTGTCTTTTGTTTTCGATTGCATTTCAGGTGTTTTTTTTTACAGAAGGAGGGTAATAGATTCCGAGACGGGTTCGGAAATTAAAGGAAAATTAAGCTGCATAGCTGCATACATGCATTTTGGAAACAGAATGCGACGTAAGAAAAGGGGAACTTAAAGCTGTCCTCGACAAATCAAAACAT…	LVP gDNA	cgagctcgaattTTTTTTTTGGGTGACTAAACTCCGGTAG	cgaaacgcgcgaGAAGTCACTGAACATGATAAGTGTGCCG	chr1:121094477-121095095
notes: did not replicate phenotype, likely prevent splicing to exon c1
